# Supplementary figures and images for: Mouse strains and sexual divergence in corneal innervation and nerve regeneration
Source: PubMed Central journal article supplement — FASEB J. 2018 Dec 18;33(3):4598–609. doi: 10.1096/fj.201801957R (PMC6404582; doi:10.1096/fj.201801957r), 2018-12-18

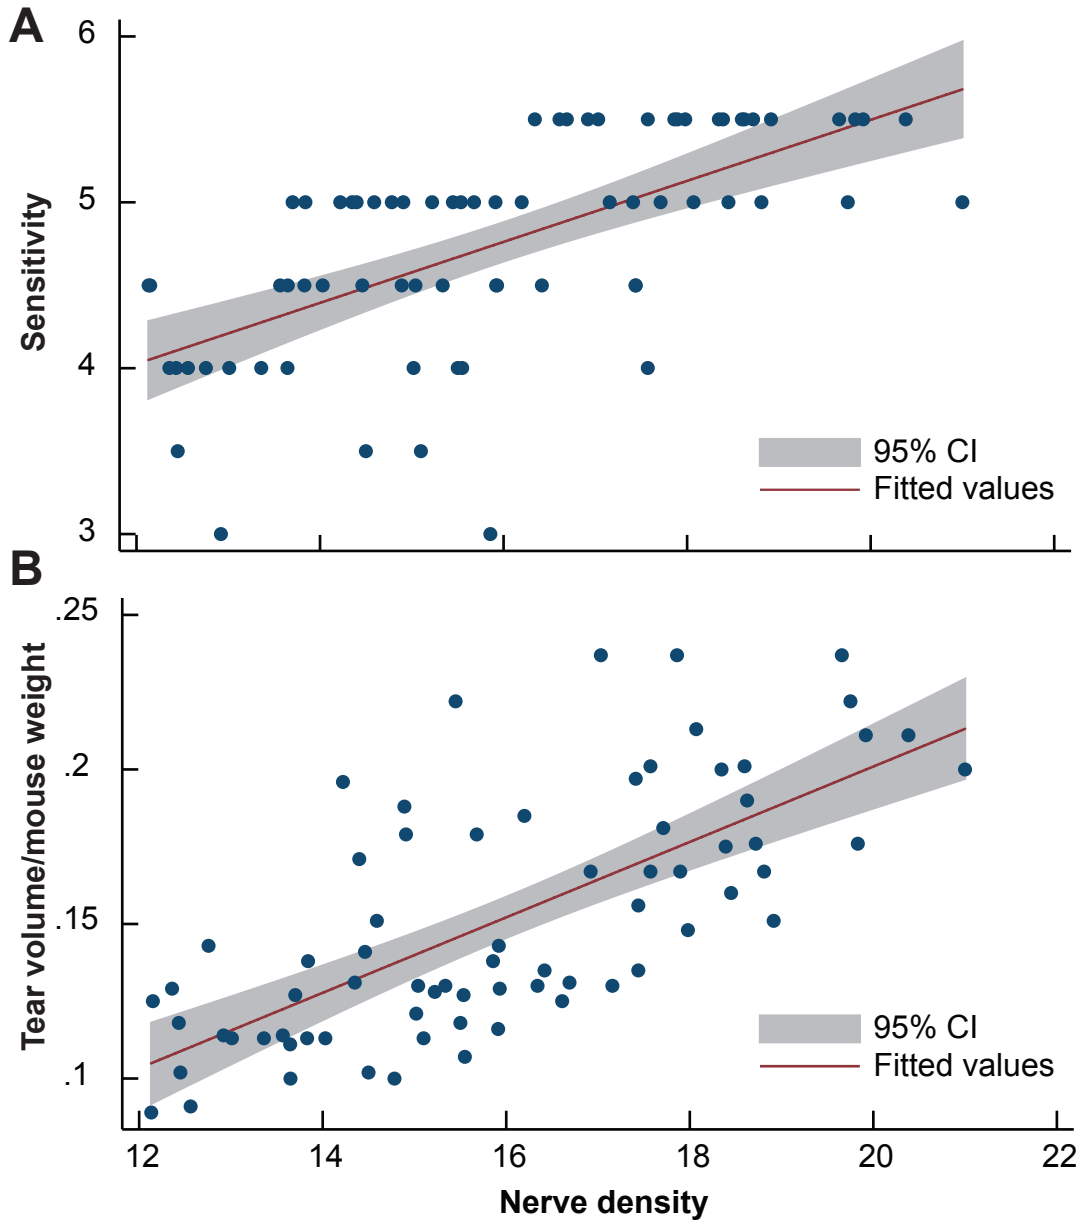

Supplemental Figure 1

Supplement: fj.201801957R.sf1.pdf [file fj.201801957R.sf1.pdf]

Supplemental Figure 2

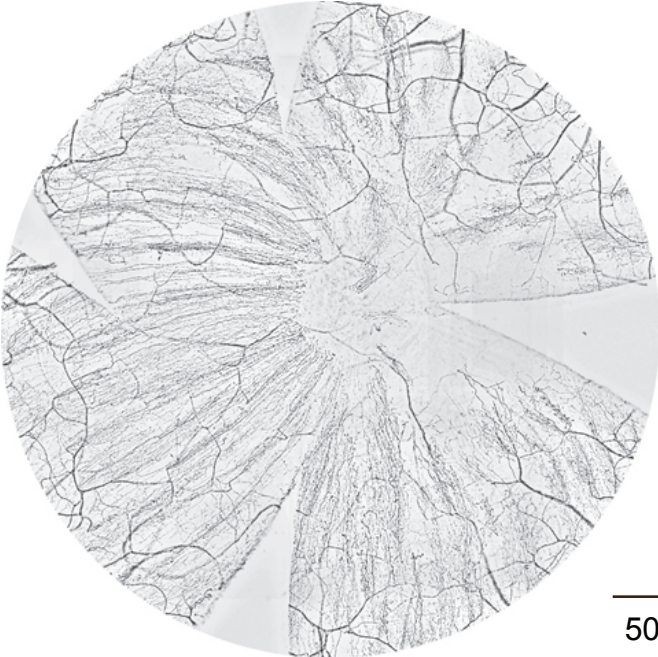

**C57BL/6 - Female**

500  $\mu$ m

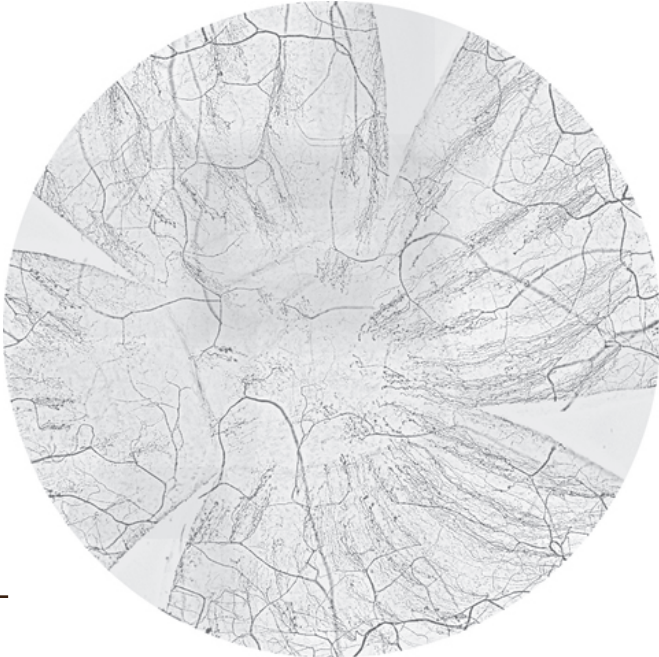

**C57BL/6 - Male**

Supplement: fj.201801957R.sf2.pdf [file fj.201801957R.sf2.pdf]
